# Supplementary material
Source: PubMed Central journal article supplement (PMC6078413)
Supplement: NIHMS772086-supplement-Table_1_Permission.pdf [file NIHMS772086-supplement-Table_1_Permission.pdf]

**AMERICAN SOCIETY FOR NUTRITION LICENSE  
TERMS AND CONDITIONS**

Mar 22, 2016

---

This is a License Agreement between Gregory Lewis ("You") and American Society for Nutrition ("American Society for Nutrition") provided by Copyright Clearance Center ("CCC"). The license consists of your order details, the terms and conditions provided by American Society for Nutrition, and the payment terms and conditions.

**All payments must be made in full to CCC. For payment instructions, please see information listed at the bottom of this form.**

|                                          |                                                                                                                 |
|------------------------------------------|-----------------------------------------------------------------------------------------------------------------|
| License Number                           | 3833950290295                                                                                                   |
| License date                             | Mar 21, 2016                                                                                                    |
| Volume number                            | 131                                                                                                             |
| Issue number                             | 2                                                                                                               |
| Licensed content publisher               | American Society for Nutrition                                                                                  |
| Licensed content publication             | The Journal of Nutrition                                                                                        |
| Licensed content title                   | Iron Deficiency and Reduced Work Capacity: A Critical Review of the Research to Determine a Causal Relationship |
| Licensed content author                  | Jere D. Haas, Thomas Brownlie IV                                                                                |
| Licensed content date                    | Feb 1, 2001                                                                                                     |
| Type of Use                              | Scholarly Journal                                                                                               |
| Requestor type                           | Academic Institution                                                                                            |
| Format                                   | Electronic                                                                                                      |
| Portion                                  | Figures/table/illustration                                                                                      |
| Number of Figures/table/illustration     | 1                                                                                                               |
| List of figures/table/illustration       | Table 1                                                                                                         |
| Will you be translating?                 | No                                                                                                              |
| Territory of distribution                | Worldwide                                                                                                       |
| Order reference number                   | None                                                                                                            |
| Title of new article                     | IRONOUT Methods Paper                                                                                           |
| Publication the new article is in        | Circulation Heart Failure                                                                                       |
| Publisher of new article                 | Lippincott Williams & Wilkins                                                                                   |
| Author of new article                    | Gregory Lewis                                                                                                   |
| Expected publication date of new article | Apr 2016                                                                                                        |
| Estimated size of new article (pages)    | 7                                                                                                               |
| Total                                    | 0.00 USD                                                                                                        |

[Terms and Conditions](#)**Terms and Conditions for Rightslink Licenses**

1) This license agreement ("Agreement") is between the Customer as identified by the user in Rightslink ("Customer") and The American Society for Nutrition, Inc, a nonprofit corporation with offices at 9650 Rockville Pike, Bethesda, Maryland 20814-3998 USA ("ASN"), regarding content published in one of the following ASN journals: *The American Journal of Clinical Nutrition (AJCN)* or *The Journal of Nutrition (JN)* or *Advances in Nutrition*. The license administrator for this Agreement is the Copyright Clearance Center (CCC).

**2) Introduction**

The publisher of this copyrighted material is ASN. By clicking "accept" in connection with completing this licensing transaction, you agree that the following terms and conditions apply to this transaction (along with the Billing and Payment terms and conditions established by CCC, at the time that you opened your Rightslink account and that are available at any time at <http://myaccount.copyright.com>.

3) ASN occasionally publishes material for which it does not hold copyright; in such instances, ASN identifies and properly cites the appropriate copyright holder. It is the Customer's responsibility to verify that ASN holds copyright for which the Customer is requesting permission. If the material is credited to another source, then ASN does not have the authority to grant permission for its reuse and this license is to be considered invalid.

**4) Limited License**

ASN hereby grants to you a non-exclusive license to use this material. Licenses are for one-time use only with a maximum distribution equal to the number that you identified in the licensing process. Except when material is licensed for reuse in a scholarly journal, magazine, newsletter, newspaper, book, or textbook, in which case permission extends to reprints of the product produced for publisher restocking, any form of republication must be completed within one year from the date hereof (although copies prepared before then may be distributed thereafter). Reprints must not be new products nor marketed as such: **reuse in new volumes or new editions must be licensed explicitly**. Any form of republication must be completed within one year from the date hereof (although copies prepared before then may be distributed thereafter); and any electronic posting is limited to the time specified in this request, if any. ASN asks that commercial organizations limit distribution of photocopies to within the organization requesting permission. Requests to distribute content copyrighted by ASN outside of the requesting organization should be processed as reprints or ePrints. Use of more than 50% of an article copyrighted by ASN in a single new work must be reviewed separately by ASN staff.

**5) Geographic Rights**

Licenses may be exercised solely in the country or countries specified by the Customer on the Quick Price or Additional Data page in Rightslink. However, in cases in which ASN has exclusive republication licensees in specific countries, licenses to reproduce full-text material in these countries may be revoked by ASN. In such cases, the Customer would be referred to the license agent in the respective country or countries. For questions about whether this would apply to your order, please contact ASN at [publications@nutrition.org](mailto:publications@nutrition.org).

**6) Alterations/Modifications**

Except for adaptations of tables and figures and for translations of content as described below, material may not be modified. Translations of figures, tables, and excerpts are

permitted as transactions within Rightslink. Translations of full-text materials must be approved by ASN before the Customer can proceed with the Rightslink transaction. Full-text translation requests processed through CCC will be considered invalid unless the Customer enters the ASN-issued approval code for the translation. A copy of all full-text translations must be sent to ASN.

#### 7) Reservation of Rights

ASN reserves all rights not specifically granted in the combination of (i) the license details provided by you and accepted in the course of this licensing transaction, (ii) these terms and conditions, and (iii) CCC's Billing and Payment terms and conditions.

#### 8) License Contingent on Payment

While you may exercise the rights licensed immediately upon issuance of the license at the end of the licensing process for the transaction, provided that you have disclosed complete and accurate details of your proposed use, no license is finally effective unless and until full payment is received from you (either by ASN or by CCC) as provided in CCC's Billing and Payment terms and conditions. If full payment is not received on a timely basis, then any license preliminarily granted shall be deemed automatically revoked and shall be void as if never granted. Further, in the event that you breach any of these terms and conditions or any of CCC's Billing and Payment terms and conditions, the license is automatically revoked and shall be void as if never granted. Use of materials as described in a revoked license, as well as any use of the materials beyond the scope of an unrevoked license, may constitute copyright infringement and publisher reserves the right to take any and all action to protect its copyright in the materials.

#### 9) Copyright Notice: Disclaimer

You must give complete credit to the original source in connection with any reproduction or adaptation of the licensed material: 'Am J Clin Nutr (year;volume:page range), American Society for Nutrition,' or 'J Nutr (year;volume:page range), American Society for Nutrition;' 'Adv Nutr (year;volume:page range), American Society for Nutrition.' For translations: Figures or tables cannot be used in advertisements.

Full-text translations of articles published in *The Journal of Nutrition* must include the following disclaimer: *Translated from the original into LANGUAGE by TRANSLATOR'S NAME. The translator assumes responsibility for the accuracy of the translation. The American Society for Nutrition is not responsible for translation errors. Readers are encouraged to access the original publication at <http://jn.nutrition.org>.* For photocopies and in-house reprints:

The article will be reprinted in its entirety without change.

No material will be attached to the reprints, and the reprint will be used for educational purposes only, not to promote, sell, or in any way endorse a product.

The citation appearing on the first page of the article must appear in the reprints.

As a courtesy, please notify the author of your intended reuse of his or her content.

All reprints must have reprinted on each: *The American Society for Nutrition, Inc., does not endorse any commercial enterprise.*

#### 10) Warranties

ASN makes no representations or warranties with respect to the licensed material.

#### 11) Indemnity

You hereby indemnify and agree to hold harmless ASN and CCC, and their respective officers, directors, employees, and agents, from and against any and all claims arising out of your use of the licensed material other than as specifically authorized pursuant to this

license.

#### 12) No Transfer of License

This license is personal to you, but may be assigned or transferred by you to a business associate (or to your employer) if you give prompt written notice of the assignment or transfer to ASN. No such assignment or transfer shall relieve you of the obligation to pay the designated license fee on a timely basis (although payment by the identified assignee can fulfill your obligation).

#### 13) No Amendment Except in Writing

This license may not be amended except in a writing signed by both parties (or, in the case of ASN, by CCC on ASN's behalf).

#### 14) Objection to Contrary Terms

ASN hereby objects to any terms contained in any purchase order, acknowledgment, check endorsement or other writing prepared by you, which terms are inconsistent with these terms and conditions or CCC's Billing and Payment terms and conditions. These terms and conditions, together with CCC's Billing and Payment terms and conditions (which are incorporated herein), comprise the entire agreement between you and ASN (and CCC) concerning this licensing transaction. In the event of any conflict between your obligations established by these terms and conditions and those established by CCC's Billing and Payment terms and conditions, these terms and conditions shall control.

#### 15) Jurisdiction

This license Agreement contains the entire understanding of the parties with respect to the licensed content and can be modified only by a signed, written agreement. This Agreement shall be construed in accordance with the laws of the State of Maryland and the US copyright laws. If any term of this Agreement shall be found invalid by any court of competent jurisdiction, such provision shall be enforced to the fullest extent that it is valid and enforceable under applicable law, and all other provisions of this Agreement shall remain in full force and effect. For state and local governments, the Terms and Conditions do not apply when in conflict with existing statutes.

#### 16) Other

There are additional terms and conditions, established by Copyright Clearance Center, Inc. ("CCC") as the administrator of this licensing service that relate to billing and payment for licenses provided through this service. Those terms and conditions apply to each transaction as if they were restated here. As a user of this service, you agreed to those terms and conditions at the time that you established your account, and you may see them again at any time at <http://myaccount.copyright.com>.

### **Terms and Conditions for Content Services**

Subject to these terms of use, any terms set forth on the particular order, and payment of the applicable fee, you may make the following uses of the ordered materials:

**Content Rental:** You may access and view a single electronic copy of the materials ordered for the time period designated at the time the order is placed. Access to the materials will be provided through a dedicated content viewer or other portal, and access will be discontinued upon expiration of the designated time period. An order for Content Rental does not include any rights to print, download, save, create additional copies, to distribute or to reuse in any way the full text or parts of the materials.

Content Purchase: You may access and download a single electronic copy of the materials ordered. Copies will be provided by email or by such other means as publisher may make available from time to time. An order for Content Purchase does not include any rights to create additional copies or to distribute copies of the materials.

The materials may be accessed and used only by the person who placed the Order or the person on whose behalf the order was placed and only in accordance with the terms included in the particular order.

Special Terms: <%=specialTerms%>

v 2.6

Questions? [customercare@copyright.com](mailto:customercare@copyright.com) or +1-855-239-3415 (toll free in the US) or +1-978-646-2777.

---

---
